# Supplementary material
Source: HighWire-hosted journal article supplement (https://bmjopen.bmj.com/content/9/3/e024324)
Supplement: inline-supplementary-material-1 [file inline-supplementary-material-1.pdf]

## **Supplementary data:**

### **Literature searches**

The databases searched were MEDLINE and MEDLINE In-Process (Ovid), Embase (Ovid), Cochrane Database of Systematic Reviews, Cochrane Central Register of Controlled Trials, Database of Abstracts of Reviews of Effects, Health Technology Assessment database, and the NHS Economic Evaluation Database.

The search strategy was based on the strategy used for the NSC evidence review published in 2012. The MEDLINE search strategy used was as follows. The strategy was adapted to search the other databases listed.

#### *Population/Condition*

1. Streptococcus agalactiae/
2. Streptococc\* agalactiae.tw.
3. group b adj5 streptococc\*.tw.
4. GBS not Guillain\*.tw.
5. OR/1-4

#### *Screening*

6. (test or tests or testing).tw.
7. detect\*.tw.
8. exp Mass screening/
9. exp Prenatal diagnosis/
10. exp Risk factors/
11. (bacteriologic\* or microbiologic\*).tw.
12. swab\*.tw.
13. culture\*.tw.
14. (colonisation or colonization).tw.
15. marker\*.tw.
16. exp Biological markers/
17. membrane adj3 rupture\*.tw.
18. (preterm labour or pre-term labour or preterm labor or pre-term labor).tw.
19. maternal fever.tw.
20. (risk based or risk-based).tw.
21. OR/6-20

#### *Epidemiology*

22. Exp Disease Transmission, Infectious/
23. Epidemiology/
24. Incidence/
25. Exp Mortality/
26. Population Surveillance/
27. (ep or tm or di or mi or mo or pc or sn).fs.
28. incidence.ti,ab.

29. OR/22-28

*Combined:*

30. 5 and 21

31. 5 and 29

32. 30 or 31

33. Limit 32 to 2012-2014
